# Supplementary material
Source: PubMed Central journal article supplement (PMC6302541)
Supplement: DB180857SupplementaryData.pdf [file DB180857SupplementaryData.pdf]

SUPPLEMENTARY DATA

**Supplementary Table 1.** Definition of outcomes in phenome wide association study in UK Biobank.

| <b>Outcome</b>              | <b>Definition (UK Biobank unless otherwise specified)</b>                                                                                                                                                                                                                                                                                                                                                                                                                                                                                                     |
|-----------------------------|---------------------------------------------------------------------------------------------------------------------------------------------------------------------------------------------------------------------------------------------------------------------------------------------------------------------------------------------------------------------------------------------------------------------------------------------------------------------------------------------------------------------------------------------------------------|
| Coronary artery disease     | (1) Myocardial infarction (MI), coronary artery bypass grafting, or coronary artery angioplasty documented in medical history at time of enrollment by a trained nurse or<br>(2) Hospitalization for ICD-10 code for acute myocardial infarction (I21.0, I21.1, I21.2, I21.4, I21.9) or<br>(3) Hospitalization for OPCS-4 coded procedure: coronary artery bypass grafting (K40.1-40.4, K41.1-41.4, K45.1-45.5) or<br>(4) Hospitalization for OPCS-4 coded procedure: coronary angioplasty ± stenting (K49.1-49.2, K49.8-49.9, K50.2, K75.1-75.4, K75.8-75.9) |
| Atrial fibrillation/flutter | History of atrial fibrillation or flutter during verbal interview with trained nurse or hospitalization for or death due to ICD code I48                                                                                                                                                                                                                                                                                                                                                                                                                      |
| Heart failure               | History of heart failure during verbal interview with trained nurse or hospitalization for or death due to ICD code I11.0, I13.0, I13.2, I125.5, I42, I50                                                                                                                                                                                                                                                                                                                                                                                                     |
| Stroke                      | History of stroke, adjudicated by UK Biobank centrally as report of stroke during verbal interview with trained nurse or hospitalization for or death due to ICD code I60-64 ( <a href="http://biobank.ctsu.ox.ac.uk/crystal/refer.cgi?id=462">http://biobank.ctsu.ox.ac.uk/crystal/refer.cgi?id=462</a> )                                                                                                                                                                                                                                                    |
| Peripheral vascular disease | History of peripheral vascular disease or intermittent claudication during verbal interview with trained nurse or hospitalization for or death due to ICD code I70, I73.8 or I73.9                                                                                                                                                                                                                                                                                                                                                                            |
| Venous thromboembolism      | History of venous thromboembolism, deep vein thrombosis or pulmonary embolism during verbal interview with trained nurse or hospitalization for death due to I26, I80.1, I80.2, I81, or I82.0                                                                                                                                                                                                                                                                                                                                                                 |
| Aortic stenosis             | History of aortic stenosis during verbal interview with trained nurse or hospitalization for ICD code I06.0, I06.2 I35.0 or I35.2                                                                                                                                                                                                                                                                                                                                                                                                                             |
| Inflammatory bowel disease  | History of inflammatory bowel disease, Crohn's disease or ulcerative colitis during verbal interview with trained nurse or hospitalization for or death due to ICD code K50 or K51                                                                                                                                                                                                                                                                                                                                                                            |
| Gastric reflux              | History of gastric reflux during verbal interview with trained nurse or hospitalization for or death due to ICD code K21                                                                                                                                                                                                                                                                                                                                                                                                                                      |
| Gallstone                   | History of gallstones during verbal interview with trained nurse or hospitalization for or death due to ICD code K56.3 or K80                                                                                                                                                                                                                                                                                                                                                                                                                                 |
| Hyperthyroidism             | History of hyperthyroidism during verbal interview with trained nurse or hospitalization for or death due to ICD code E05                                                                                                                                                                                                                                                                                                                                                                                                                                     |
| Hypothyroidism              | History of hypothyroidism during verbal interview with trained nurse or hospitalization for or death due to ICD code E03                                                                                                                                                                                                                                                                                                                                                                                                                                      |
| Gout                        | History of gout during verbal interview with trained nurse or hospitalization for or death due to ICD code M10                                                                                                                                                                                                                                                                                                                                                                                                                                                |
| Enlarged prostate           | History of enlarged prostate during verbal interview with trained nurse or hospitalization for or death due to ICD code N40                                                                                                                                                                                                                                                                                                                                                                                                                                   |
| Uterine fibroids            | History of uterine fibroids during verbal interview with trained nurse or hospitalization for or death due to ICD code D25                                                                                                                                                                                                                                                                                                                                                                                                                                    |
| Migraine                    | History of migraine during verbal interview with trained nurse or hospitalization for or death due to ICD code G43                                                                                                                                                                                                                                                                                                                                                                                                                                            |
| Depression                  | History of depression during verbal interview with trained nurse or hospitalization for or death due to ICD code F32                                                                                                                                                                                                                                                                                                                                                                                                                                          |
| Anxiety                     | History of anxiety/panic attacks during verbal interview with trained nurse or hospitalization for or death due to ICD code F41                                                                                                                                                                                                                                                                                                                                                                                                                               |
| Osteoporosis                | History of osteoporosis during verbal interview with trained nurse or hospitalization for or death due to ICD code M80 or M81                                                                                                                                                                                                                                                                                                                                                                                                                                 |
| Osteoarthritis              | History of osteoarthritis during verbal interview with trained nurse or hospitalization for or death due to ICD code M15-19                                                                                                                                                                                                                                                                                                                                                                                                                                   |
| Sciatica                    | History of sciatica during verbal interview with trained nurse or hospitalization for or death due to ICD code M54.3                                                                                                                                                                                                                                                                                                                                                                                                                                          |
| Prolapsed disc              | History of prolapsed disc/slipped disc during verbal interview with trained nurse or hospitalization for or death due to ICD code M50.2 or M51.2                                                                                                                                                                                                                                                                                                                                                                                                              |
| Asthma                      | History of asthma during verbal interview with trained nurse or hospitalization for or death due to ICD code J45 or J46                                                                                                                                                                                                                                                                                                                                                                                                                                       |

SUPPLEMENTARY DATA

|                   |                                                                                                                                                                                                                         |
|-------------------|-------------------------------------------------------------------------------------------------------------------------------------------------------------------------------------------------------------------------|
| COPD/Emphysema    | History of chronic obstructive airways disease, emphysema/chronic bronchitis or emphysema during verbal interview with trained nurse or hospitalization for or death due to ICD code J41-44                             |
| Pneumonia         | History of pneumonia during verbal interview with trained nurse or hospitalization for or death due to ICD code J12-18                                                                                                  |
| Hayfever          | History of hayfever during verbal interview with trained nurse or hospitalization for or death due to ICD code J30                                                                                                      |
| Lung cancer       | History of breast cancer during verbal interview with trained nurse or hospitalization for or death due to ICD code C34                                                                                                 |
| Colorectal cancer | History of large bowel cancer/colorectal cancer, colon cancer/sigmoid cancer or rectal cancer during verbal interview with trained nurse or hospitalization for or death due to ICD code C18                            |
| Skin cancer       | History of skin cancer, malignant melanoma, non-melanoma skin cancer, basal cell carcinoma or squamous cell carcinoma during verbal interview with trained nurse or hospitalization for or death due to ICD code C43-44 |
| Prostate cancer   | History of prostate cancer during verbal interview with trained nurse or hospitalization for or death due to ICD code C61                                                                                               |
| Cervical cancer   | History of cervical cancer or cin cells at the cervix during verbal interview with trained nurse or hospitalization for or death due to ICD code C53                                                                    |

Abbreviations: COPD, chronic obstructive pulmonary disease; ICD, international classification of disease

**Supplementary Table 2.** Low frequency variants at novel loci associated with WHRadjBMI at genome wide significance in UK Biobank.

| Variant     | CHR | BP        | EA | MAF      | Gene     | Consequence | Beta   | SE    | P-value  |
|-------------|-----|-----------|----|----------|----------|-------------|--------|-------|----------|
| rs141845046 | 1   | 154987704 | T  | 0.0207   | ZBTB7B   | Pro190Ser   | -0.056 | 0.008 | 9.95E-13 |
| rs72704117  | 1   | 155175089 | T  | 0.02193  | THBS3    | Arg102Gln   | -0.052 | 0.008 | 7.82E-12 |
| rs52826764  | 2   | 20205541  | T  | 0.02913  | MATN3    | Glu252Lys   | -0.039 | 0.007 | 2.93E-09 |
| rs56188432  | 2   | 158406865 | G  | 0.002185 | ACVR1C   | Ile195Thr   | -0.147 | 0.024 | 1.00E-09 |
| rs55920843  | 2   | 158412701 | G  | 0.01135  | ACVR1C   | Asn150His   | -0.088 | 0.010 | 3.40E-17 |
| rs144397126 | 3   | 129207191 | C  | 0.01439  | IFT122   | Glu699Ala   | 0.066  | 0.009 | 1.76E-12 |
| rs11722554  | 4   | 5016883   | A  | 0.03724  | CYTL1    | Arg136Cys   | -0.034 | 0.006 | 5.60E-09 |
| rs140201358 | 11  | 823586    | G  | 0.01324  | PNPLA2   | Asn252Lys   | 0.087  | 0.010 | 3.21E-19 |
| rs62621409  | 11  | 36458997  | G  | 0.04136  | PRR5L    | Thr113Ala   | 0.031  | 0.006 | 1.86E-08 |
| rs145878042 | 12  | 48143315  | G  | 0.01035  | RAPGEF3  | Leu258Pro   | -0.077 | 0.011 | 1.72E-12 |
| rs75173589  | 12  | 124333367 | A  | 0.01387  | DNAH10   | Val1896Met  | -0.059 | 0.009 | 5.90E-10 |
| rs151177426 | 14  | 21463013  | T  | 2.36E-05 | METTL17  | Arg277Cys   | -1.369 | 0.235 | 5.65E-09 |
| rs61747585  | 14  | 52508842  | A  | 0.04157  | NID2     | Glu602Asp   | 0.031  | 0.006 | 3.60E-08 |
| rs62070804  | 17  | 27889643  | T  | 0.01768  | ABHD15   | Arg448Gln   | 0.046  | 0.008 | 3.50E-08 |
| rs141385558 | 17  | 27893545  | T  | 0.002571 | ABHD15   | Gly147Asp   | 0.148  | 0.022 | 1.66E-11 |
| rs62621197  | 19  | 8670147   | T  | 0.03098  | ADAMTS10 | Arg62Gln    | -0.039 | 0.006 | 1.21E-09 |

CHR, chromosome; BP, base pair; EA, effect allele; MAF, minor allele frequency. Variants within the MHC locus are reported in online data table 1.

SUPPLEMENTARY DATA

**Supplementary Table 3.** Common variants at novel loci associated with WHRadjBMI at genome wide significance in UK Biobank.

| Variant    | CHR | BP        | EA | MAF     | Gene           | Consequence     | Beta   | SE    | P-value  |
|------------|-----|-----------|----|---------|----------------|-----------------|--------|-------|----------|
| rs3753841  | 1   | 103379918 | G  | 0.3985  | COL11A1        | Pro1284Leu      | -0.017 | 0.002 | 5.07E-13 |
| rs1129942  | 1   | 172437592 | G  | 0.221   | C1orf105       | Ser127Asn       | 0.021  | 0.003 | 1.72E-14 |
| rs3851294  | 1   | 205130413 | A  | 0.0895  | DSTYK          | Cys641Arg       | -0.024 | 0.004 | 1.19E-09 |
| rs3732083  | 2   | 207041053 | C  | 0.4344  | GPR1           | Ile307Val       | 0.013  | 0.002 | 1.10E-08 |
| rs1250259  | 2   | 216300482 | T  | 0.2608  | FN1            | Gln15Leu        | 0.016  | 0.003 | 1.06E-10 |
| rs9711321  | 2   | 239697444 | T  | 0.4902  | AC144525.1     | Splice Acceptor | -0.014 | 0.002 | 6.78E-10 |
| rs2276853  | 3   | 47282303  | G  | 0.4058  | KIF9           | Arg638Trp       | -0.015 | 0.002 | 9.51E-11 |
| rs3087866  | 3   | 49054692  | T  | 0.2233  | DALRD3         | Gln132Arg       | -0.021 | 0.003 | 4.04E-15 |
| rs2625973  | 3   | 129284818 | C  | 0.2826  | PLXND1         | Leu1412Val      | -0.020 | 0.002 | 1.07E-15 |
| rs34884217 | 4   | 944210    | C  | 0.1064  | TMEM175        | Splice Acceptor | -0.021 | 0.004 | 6.59E-09 |
| rs34311866 | 4   | 951947    | C  | 0.1753  | TMEM175        | Met393Thr       | 0.021  | 0.003 | 9.03E-13 |
| rs13107325 | 4   | 103188709 | T  | 0.07169 | SLC39A8        | Ala391Thr       | -0.033 | 0.004 | 2.07E-14 |
| rs4532349  | 5   | 77473165  | G  | 0.2281  | AP3B1          | Synonymous      | 0.015  | 0.003 | 1.85E-08 |
| rs34813    | 5   | 102433409 | A  | 0.3098  | GIN1           | Thr239Met       | -0.016 | 0.002 | 9.80E-11 |
| rs9388768  | 6   | 130374102 | C  | 0.3388  | L3MBTL3        | Thr183Asn       | -0.017 | 0.002 | 1.05E-12 |
| rs3124784  | 6   | 160952838 | A  | 0.2779  | LPA            | Arg2016Cys      | 0.014  | 0.002 | 6.77E-09 |
| rs2301680  | 7   | 93116299  | T  | 0.4991  | CALCR          | Ser17Pro        | 0.014  | 0.002 | 1.13E-09 |
| rs4072134  | 8   | 11872395  | G  | 0.4653  | RP11-481A20.11 | Val55Ala        | 0.016  | 0.002 | 2.04E-12 |
| rs10902221 | 11  | 802379    | G  | 0.4993  | PIDD           | Gln331Arg       | 0.016  | 0.002 | 3.29E-13 |
| rs5215     | 11  | 17408630  | T  | 0.3521  | KCNJ11         | Val337Ile       | 0.016  | 0.002 | 2.68E-11 |
| rs34312154 | 11  | 47470345  | C  | 0.1071  | RAPSN          | Arg58Cys        | 0.021  | 0.004 | 3.24E-09 |
| rs3741378  | 11  | 65408937  | A  | 0.1394  | SIPA1          | Ser182Phe       | -0.023 | 0.003 | 1.24E-12 |
| rs10891314 | 11  | 111916647 | T  | 0.3599  | DLAT           | Asp451Asn       | -0.023 | 0.002 | 4.48E-23 |
| rs12146709 | 12  | 30888001  | A  | 0.2464  | CAPRIN2        | Lys237Arg       | -0.015 | 0.003 | 6.21E-09 |
| rs2277339  | 12  | 57146069  | C  | 0.1067  | PRIM1          | Asp5Ala         | 0.024  | 0.004 | 4.55E-11 |
| rs3764002  | 12  | 108618630 | G  | 0.26    | WSCD2          | Thr266Ile       | -0.017 | 0.003 | 5.37E-11 |
| rs11057353 | 12  | 124265687 | T  | 0.3898  | DNAH10         | Ser167Pro       | 0.019  | 0.002 | 3.22E-17 |
| rs11057401 | 12  | 124427306 | T  | 0.3092  | CCDC92         | Ser70Cys        | -0.036 | 0.002 | 1.78E-50 |

SUPPLEMENTARY DATA

|            |    |           |   |         |          |            |        |       |          |
|------------|----|-----------|---|---------|----------|------------|--------|-------|----------|
| rs36127550 | 12 | 133780309 | A | 0.177   | ZNF268   | Leu679Phe  | -0.018 | 0.003 | 5.45E-10 |
| rs1051858  | 14 | 58831142  | T | 0.3488  | ARID4A   | Thr779Ala  | 0.013  | 0.002 | 1.23E-08 |
| rs3959569  | 15 | 42115747  | G | 0.3272  | MAPKBP1  | Arg1117Pro | 0.016  | 0.002 | 2.97E-11 |
| rs1715919  | 15 | 56756285  | C | 0.1023  | MNS1     | Gln55Pro   | 0.022  | 0.004 | 1.31E-09 |
| rs3747579  | 16 | 4445327   | G | 0.2959  | CORO7    | Arg193Gln  | 0.019  | 0.002 | 3.30E-14 |
| rs12923138 | 16 | 67233266  | C | 0.4259  | ELMO3    | Lys66Gln   | -0.012 | 0.002 | 4.85E-08 |
| rs8052655  | 16 | 67409180  | C | 0.05493 | LRRC36   | Gly241Ser  | -0.031 | 0.005 | 1.64E-09 |
| rs10445337 | 17 | 44067400  | A | 0.2174  | MAPT     | Ser447Pro  | 0.018  | 0.003 | 6.74E-11 |
| rs9907379  | 17 | 59489893  | C | 0.2144  | C17orf82 | Leu186Pro  | 0.015  | 0.003 | 1.30E-08 |
| rs3744448  | 17 | 59533868  | T | 0.1472  | TBX4     | Gly6Ala    | 0.020  | 0.003 | 1.45E-10 |
| rs61742072 | 17 | 76433899  | C | 0.1744  | DNAH17   | His3947Tyr | -0.018 | 0.003 | 1.56E-09 |
| rs429358   | 19 | 45411941  | A | 0.1541  | APOE     | Cys130Arg  | -0.030 | 0.003 | 2.97E-22 |
| rs1042917  | 21 | 47545768  | C | 0.4856  | COL6A2   | Arg680His  | -0.013 | 0.002 | 1.41E-09 |
| rs4823086  | 22 | 30688659  | A | 0.1224  | TBC1D10A | Arg441His  | 0.019  | 0.003 | 3.88E-08 |
| rs1053593  | 22 | 35660875  | T | 0.3628  | HMGXB4   | Gly165Val  | 0.014  | 0.002 | 6.88E-09 |

CHR, chromosome; BP, base pair; EA, effect allele; MAF, minor allele frequency. Variants within the MHC locus are reported in online data table 1.

SUPPLEMENTARY DATA

**Supplementary Table 4.** Replication of novel variants associated with WHRadjBMI in the GIANT consortium.

| Variant    | CHR | BP        | EA | Gene       | UK Biobank |       |          | GIANT  |       |          | P-heterogeneity |
|------------|-----|-----------|----|------------|------------|-------|----------|--------|-------|----------|-----------------|
|            |     |           |    |            | Beta       | SE    | P-value  | Beta   | SE    | P-value  |                 |
| rs11722554 | 4   | 5016883   | A  | CYTL1      | -0.034     | 0.006 | 5.60E-09 | -0.030 | 0.015 | 0.044    | 0.8             |
| rs3753841  | 1   | 103379918 | G  | COL11A1    | -0.017     | 0.002 | 5.07E-13 | 0.001  | 0.004 | 0.91     | 0.00059         |
| rs1129942  | 1   | 172437592 | G  | C1orf105   | 0.021      | 0.003 | 1.72E-14 | 0.023  | 0.004 | 1.80E-07 | 0.63            |
| rs3851294  | 1   | 205130413 | A  | DSTYK      | -0.024     | 0.004 | 1.19E-09 | -0.026 | 0.007 | 0.00024  | 0.77            |
| rs3732083  | 2   | 207041053 | C  | GPR1       | 0.013      | 0.002 | 1.10E-08 | 0.007  | 0.004 | 0.091    | 0.23            |
| rs1250259  | 2   | 216300482 | T  | FN1        | 0.016      | 0.003 | 1.06E-10 | 0.017  | 0.005 | 0.00078  | 0.92            |
| rs9711321  | 2   | 239697444 | T  | AC144525.1 | -0.014     | 0.002 | 6.78E-10 | 0.003  | 0.004 | 0.51     | 0.00068         |
| rs2276853  | 3   | 47282303  | G  | KIF9       | -0.015     | 0.002 | 9.51E-11 | -0.010 | 0.004 | 0.019    | 0.34            |
| rs3087866  | 3   | 49054692  | T  | DALRD3     | -0.021     | 0.003 | 4.04E-15 | -0.019 | 0.005 | 0.00011  | 0.72            |
| rs2625973  | 3   | 129284818 | C  | PLXND1     | -0.020     | 0.002 | 1.07E-15 | -0.012 | 0.005 | 0.0092   | 0.15            |
| rs13107325 | 4   | 103188709 | T  | SLC39A8    | -0.033     | 0.004 | 2.07E-14 | -0.026 | 0.008 | 0.00066  | 0.42            |
| rs4532349  | 5   | 77473165  | G  | AP3B1      | 0.015      | 0.003 | 1.85E-08 | 0.007  | 0.004 | 0.074    | 0.12            |
| rs34813    | 5   | 102433409 | A  | GIN1       | -0.016     | 0.002 | 9.80E-11 | -0.010 | 0.005 | 0.062    | 0.28            |
| rs9388768  | 6   | 130374102 | C  | L3MBTL3    | -0.017     | 0.002 | 1.05E-12 | -0.017 | 0.005 | 0.00023  | 0.98            |
| rs2301680  | 7   | 93116299  | A  | CALCR      | 0.014      | 0.002 | 1.13E-09 | 0.012  | 0.004 | 0.005    | 0.75            |
| rs10902221 | 11  | 802379    | T  | PIDD       | 0.016      | 0.002 | 3.29E-13 | 0.005  | 0.005 | 0.26     | 0.04            |
| rs5215     | 11  | 17408630  | C  | KCNJ11     | 0.016      | 0.002 | 2.68E-11 | 0.007  | 0.004 | 0.04     | 0.045           |
| rs3741378  | 11  | 65408937  | T  | SIPA1      | -0.023     | 0.003 | 1.24E-12 | -0.016 | 0.005 | 0.001    | 0.24            |
| rs10891314 | 11  | 111916647 | A  | DLAT       | -0.023     | 0.002 | 4.48E-23 | -0.018 | 0.005 | 0.00033  | 0.36            |
| rs12146709 | 12  | 30888001  | C  | CAPRIN2    | -0.015     | 0.003 | 6.21E-09 | -0.016 | 0.005 | 0.001    | 0.85            |
| rs2277339  | 12  | 57146069  | G  | PRIM1      | 0.024      | 0.004 | 4.55E-11 | 0.018  | 0.008 | 0.014    | 0.5             |
| rs3764002  | 12  | 108618630 | T  | WSCD2      | -0.017     | 0.003 | 5.37E-11 | -0.018 | 0.004 | 7.40E-06 | 0.78            |
| rs11057353 | 12  | 124265687 | T  | DNAH10     | 0.019      | 0.002 | 3.22E-17 | 0.017  | 0.004 | 1.50E-06 | 0.6             |
| rs11057401 | 12  | 124427306 | A  | CCDC92     | -0.036     | 0.002 | 1.78E-50 | -0.028 | 0.005 | 2.80E-10 | 0.13            |
| rs1051858  | 14  | 58831142  | G  | ARID4A     | 0.013      | 0.002 | 1.23E-08 | 0.006  | 0.004 | 0.15     | 0.16            |
| rs1715919  | 15  | 56756285  | G  | MNS1       | 0.022      | 0.004 | 1.31E-09 | 0.025  | 0.007 | 0.00041  | 0.73            |
| rs3747579  | 16  | 4445327   | C  | CORO7      | 0.019      | 0.002 | 3.30E-14 | 0.018  | 0.004 | 8.20E-07 | 0.87            |

## SUPPLEMENTARY DATA

|            |    |          |   |          |        |       |          |        |       |          |      |
|------------|----|----------|---|----------|--------|-------|----------|--------|-------|----------|------|
| rs12923138 | 16 | 67233266 | C | ELMO3    | -0.012 | 0.002 | 4.85E-08 | -0.005 | 0.005 | 0.3      | 0.22 |
| rs8052655  | 16 | 67409180 | A | LRRC36   | -0.031 | 0.005 | 1.64E-09 | -0.044 | 0.011 | 3.80E-05 | 0.28 |
| rs10445337 | 17 | 44067400 | C | MAPT     | 0.018  | 0.003 | 6.74E-11 | 0.013  | 0.004 | 0.0033   | 0.37 |
| rs3744448  | 17 | 59533868 | C | TBX4     | 0.020  | 0.003 | 1.45E-10 | 0.011  | 0.006 | 0.073    | 0.19 |
| rs1042917  | 21 | 47545768 | A | COL6A2   | -0.013 | 0.002 | 1.41E-09 | -0.011 | 0.005 | 0.017    | 0.62 |
| rs4823086  | 22 | 30688659 | T | TBC1D10A | 0.019  | 0.003 | 3.88E-08 | 0.008  | 0.007 | 0.28     | 0.18 |
| rs1053593  | 22 | 35660875 | G | HMGXB4   | 0.014  | 0.002 | 6.88E-09 | 0.014  | 0.004 | 5.10E-05 | 0.91 |

CHR, chromosome; BP, base pair; EA, effect allele.

SUPPLEMENTARY DATA

**Supplementary Table 5.** Replication of association of *ACVR1C* variants with WHRadjBMI in the GIANT consortium, Atherosclerosis Risk in Communities study and Framingham Heart Study.

| <b>Variant</b>                               | <b>UK Biobank</b>                       | <b>Replication Source</b> | <b>Replication</b>      | <b>Test for Heterogeneity</b> |
|----------------------------------------------|-----------------------------------------|---------------------------|-------------------------|-------------------------------|
| rs7594480                                    | Beta -0.019,<br>p=1.6*10 <sup>-5</sup>  | GIANT<br>(n=224156)       | Beta -0.019,<br>p=0.002 | p=0.99                        |
| rs72927479                                   | Beta -0.035,<br>p=2.6*10 <sup>-12</sup> | ARIC+FHS<br>(n=13704)     | Beta -0.03,<br>p=0.48   | p=0.78                        |
| rs55920843                                   | Beta -0.09,<br>p=3.4*10 <sup>-17</sup>  | ARIC+FHS<br>(n=13704)     | Beta -0.06,<br>p=0.39   | p=0.66                        |
| rs56188432                                   | Beta -0.15,<br>p=1.0*10 <sup>-9</sup>   | ARIC+FHS<br>(n=13704)     | Beta -0.28,<br>p=0.08   | p=0.41                        |
| Gene score meta-analysis<br>(GIANT+ARIC+FHS) |                                         |                           | Beta -0.07,<br>p=0.0005 | p=0.79                        |
| Gene score meta-analysis (ARIC+FHS)          |                                         |                           | Beta -0.07,<br>p=0.06   | p=0.69                        |

SUPPLEMENTARY DATA

**Supplementary Table 6.** Rare predicted damaging variants in MIGEN.

| <b>CHR:POS_REF/ALT</b> | <b>Consequence</b> | <b>Amino Acid Change</b> | <b>Cases With Variant</b> | <b>Controls with Variant</b> |
|------------------------|--------------------|--------------------------|---------------------------|------------------------------|
| 2:158390466_T/C        | Missense           | Ile482Met                | 1                         | 2                            |
| 2:158390483_G/A        | Missense           | Arg477Cys                | 0                         | 1                            |
| 2:158390507_C/T        | Missense           | Gly469Arg                | 0                         | 1                            |
| 2:158390522_A/T        | Missense           | Cys464Ser                | 0                         | 1                            |
| 2:158390552_G/A        | Missense           | Leu454Phe                | 0                         | 1                            |
| 2:158395119_C/T        | Missense           | Arg441Gln                | 0                         | 1                            |
| 2:158395120_G/A        | Stop Gained        | Arg441Ter                | 1                         | 0                            |
| 2:158395148_C/T        | Missense           | Met431Ile                | 1                         | 0                            |
| 2:158395150_T/C        | Missense           | Met431Val                | 0                         | 1                            |
| 2:158397620_G/A        | Missense           | Arg403Trp                | 0                         | 3                            |
| 2:158397673_G/A        | Missense           | Ser385Phe                | 0                         | 1                            |
| 2:158400983_A/C        | Missense           | Leu306Arg                | 0                         | 1                            |
| 2:158401013_G/T        | Missense           | Ala296Glu                | 0                         | 1                            |
| 2:158401014_C/T        | Missense           | Ala296Thr                | 0                         | 1                            |
| 2:158401074_C/A        | Missense           | Gly276Cys                | 0                         | 1                            |
| 2:158401099_C/G        | Missense           | Trp267Cys                | 0                         | 1                            |
| 2:158401119_C/T        | Missense           | Gly261Arg                | 0                         | 1                            |
| 2:158406764_C/T        | Missense           | Glu229Lys                | 0                         | 1                            |
| 2:158406778_A/T        | Missense           | Phe224Tyr                | 0                         | 1                            |
| 2:158406804_A/C        | Missense           | Cys215Trp                | 0                         | 1                            |
| 2:158406807_C/T        | Stop Gained        | Trp214Ter                | 0                         | 1                            |
| 2:158406865_A/G        | Missense           | Ile195Thr                | 1                         | 21                           |
| 2:158406883_C/T        | Missense           | Arg189Lys                | 0                         | 2                            |
| 2:158443708_G/A        | Missense           | Leu99Phe                 | 0                         | 1                            |
| 2:158443738_T/G        | Missense           | Thr89Pro                 | 1                         | 0                            |
| 2:158443752_G/A        | Missense           | Thr84Ile                 | 0                         | 1                            |
| Total                  |                    |                          | 5                         | 47                           |

**Supplementary Table 7.** Rare predicted damaging variants in ARIC.

| <b>CHR:POS_REF/ALT</b> | <b>Consequence</b> | <b>Amino Acid Change</b> | <b>Cases With Variant</b> | <b>Controls with Variant</b> |
|------------------------|--------------------|--------------------------|---------------------------|------------------------------|
| 2:158397620_G/A        | Missense           | Arg403Trp                | 0                         | 3                            |
| 2:158406865_A/G        | Missense           | Ile195Thr                | 0                         | 13                           |
| Total                  |                    |                          | 0                         | 16                           |



SUPPLEMENTARY DATA

**Supplementary Table 8.** Rare predicted damaging variants in T2D Genes.

| <b>CHR:POS_REF/ALT</b> | <b>Consequence</b> | <b>Amino Acid Change</b> | <b>Individuals With Variant</b> |
|------------------------|--------------------|--------------------------|---------------------------------|
| 2:158397652_T/C        | Missense           | Tyr392Cys                | 1                               |
| 2:158399291_C/G        | Missense           | Gly343Arg                | 1                               |
| 2:158399353_C/T        | Missense           | Arg322Gln                | 1                               |
| 2:158399372_T/C        | Missense           | Lys316Gly                | 1                               |
| 2:158400962_G/C        | Missense           | Thr313Arg                | 1                               |
| 2:158400987_G/A        | Missense           | His305Tyr                | 1                               |
| 2:158406865_A/G        | Missense           | Ile195Thr                | 13*                             |
| 2:158401112_C/T        | Stop Gained        | Trp263Ter                | 1                               |
| 2:158406872_T/C        | Missense           | Arg193Gly                | 1                               |
| 2:158406883_C/T        | Missense           | Arg189Lys                | 3                               |
| 2:158412605_C/G        | Missense           | Gly182Arg                | 1                               |
| 2:158412659_C/G        | Missense           | Gly164Arg                | 9                               |
| 2:158443926_A/C        | Missense           | Leu26Arg                 | 2                               |
| 2:158443747_A/T        | Missense           | Cys86Ser                 | 1                               |
| 2:158485113_A/G        | Missense           | Leu15Pro                 | 1                               |
| Total                  |                    |                          | 37                              |

Note: \*One individual with I195T also carries an additional damaging variant, hence 37 individuals carried damaging variants in total. The Genetic Association Interactive Tool does not provide information on individual variants by case-control status, hence this supplementary table does not report variant case-control status as supplementary tables 2 and 3 do.

SUPPLEMENTARY DATA

**Supplementary Figure 1.** Quantile-quantile plot of p-values from waist-to-hip ratio adjusted for body mass index GWAS.

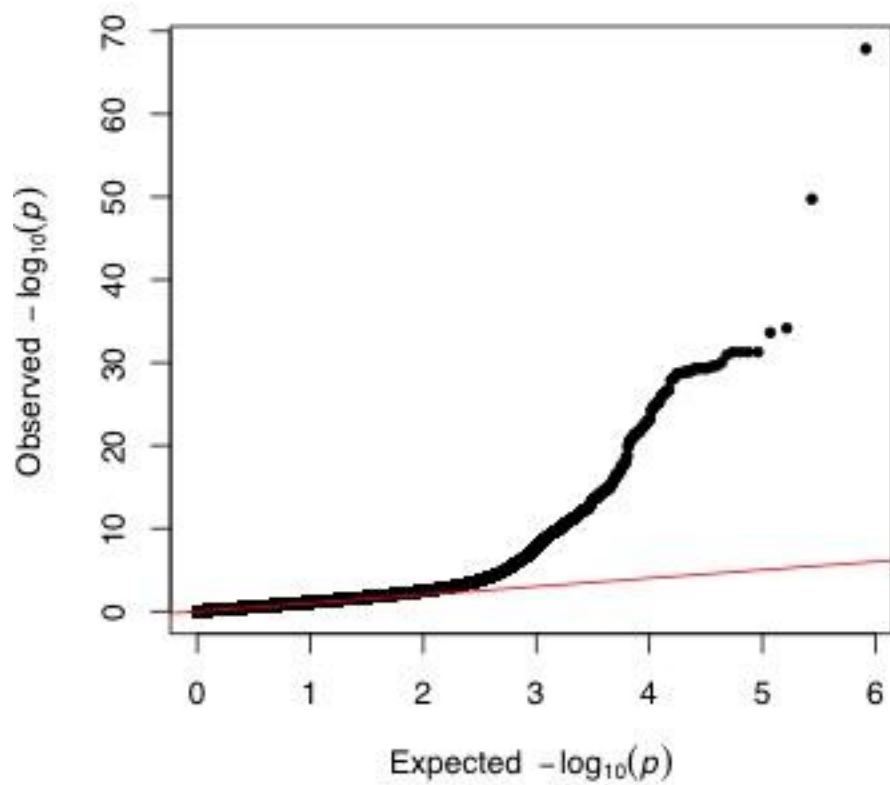

SUPPLEMENTARY DATA

**Supplementary Figure 2.** Association of the minor allele (G) of rs72927479 with abdominal obesity, type 2 diabetes and *ACVR1C* expression in the Genotype-Tissue Expression dataset.

**A. Waist-to-hip ratio adjusted for body mass index**

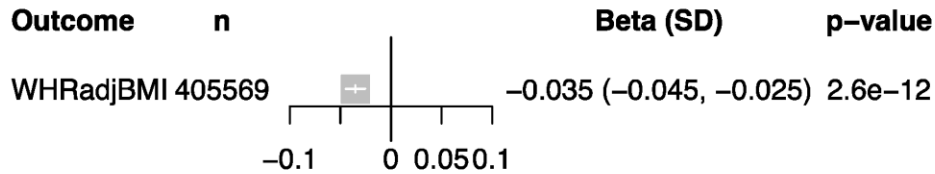

**B. Type 2 diabetes**

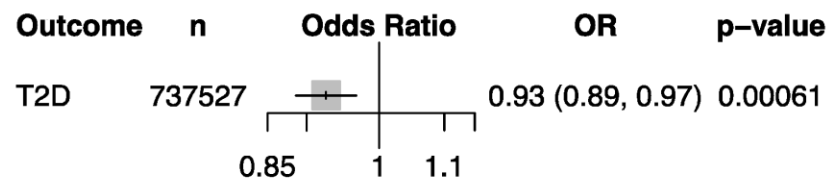

**C. Expression of *ACVR1C***

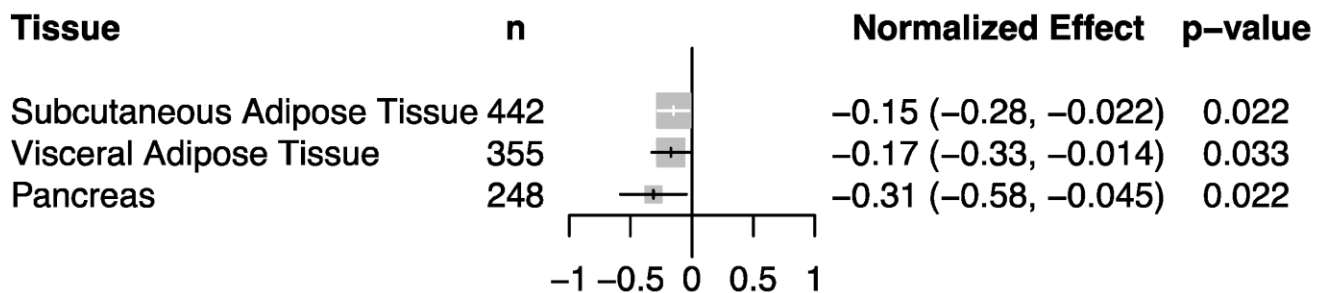

SUPPLEMENTARY DATA

**Online Data 1.** Independent variants associated with WHRadjBMI in UK Biobank at genome wide significance

| Variant     | CHR | BP        | EA | MAF   | Beta   | SE    | P-value  |
|-------------|-----|-----------|----|-------|--------|-------|----------|
| rs3753841   | 1   | 103379918 | G  | 0.399 | -0.017 | 0.002 | 5.07E-13 |
| rs61730011  | 1   | 119427467 | C  | 0.047 | -0.065 | 0.005 | 6.94E-35 |
| rs10494217  | 1   | 119469188 | T  | 0.173 | 0.020  | 0.003 | 1.27E-11 |
| rs141845046 | 1   | 154987704 | T  | 0.021 | -0.056 | 0.008 | 9.95E-13 |
| rs72704117  | 1   | 155175089 | T  | 0.022 | -0.052 | 0.008 | 7.82E-12 |
| rs1129942   | 1   | 172437592 | G  | 0.221 | 0.021  | 0.003 | 1.72E-14 |
| rs3851294   | 1   | 205130413 | A  | 0.090 | -0.024 | 0.004 | 1.19E-09 |
| rs52826764  | 2   | 20205541  | T  | 0.029 | -0.039 | 0.007 | 2.93E-09 |
| rs56188432  | 2   | 158406865 | G  | 0.002 | -0.147 | 0.024 | 1.00E-09 |
| rs55920843  | 2   | 158412701 | G  | 0.011 | -0.088 | 0.010 | 3.40E-17 |
| rs61748245  | 2   | 165476253 | A  | 0.345 | -0.016 | 0.002 | 3.39E-12 |
| rs7607980   | 2   | 165551201 | C  | 0.120 | -0.037 | 0.003 | 5.67E-27 |
| rs61739909  | 2   | 188245439 | G  | 0.003 | -0.138 | 0.020 | 4.67E-12 |
| rs3732083   | 2   | 207041053 | C  | 0.434 | 0.013  | 0.002 | 1.10E-08 |
| rs1250259   | 2   | 216300482 | T  | 0.261 | 0.016  | 0.003 | 1.06E-10 |
| rs9711321   | 2   | 239697444 | T  | 0.490 | -0.014 | 0.002 | 6.78E-10 |
| rs11718898  | 3   | 12848822  | T  | 0.337 | 0.016  | 0.002 | 6.90E-12 |
| rs2276853   | 3   | 47282303  | G  | 0.406 | -0.015 | 0.002 | 9.51E-11 |
| rs3087866   | 3   | 49054692  | T  | 0.223 | -0.021 | 0.003 | 4.04E-15 |
| rs419752    | 3   | 52429665  | T  | 0.049 | -0.038 | 0.005 | 1.31E-13 |
| rs13303     | 3   | 52558008  | T  | 0.444 | 0.022  | 0.002 | 7.22E-23 |
| rs144397126 | 3   | 129207191 | C  | 0.014 | 0.066  | 0.009 | 1.76E-12 |
| rs2625973   | 3   | 129284818 | C  | 0.283 | -0.020 | 0.002 | 1.07E-15 |
| rs34884217  | 4   | 944210    | C  | 0.106 | -0.021 | 0.004 | 6.59E-09 |
| rs34311866  | 4   | 951947    | C  | 0.175 | 0.021  | 0.003 | 9.03E-13 |
| rs11722554  | 4   | 5016883   | A  | 0.037 | -0.034 | 0.006 | 5.60E-09 |
| rs1804080   | 4   | 89625427  | C  | 0.162 | -0.019 | 0.003 | 9.83E-11 |
| rs13107325  | 4   | 103188709 | T  | 0.072 | -0.033 | 0.004 | 2.07E-14 |
| rs4865615   | 5   | 54960673  | C  | 0.339 | 0.015  | 0.002 | 2.41E-10 |
| rs13178412  | 5   | 55831021  | G  | 0.142 | 0.022  | 0.003 | 3.71E-12 |
| rs4532349   | 5   | 77473165  | G  | 0.228 | 0.015  | 0.003 | 1.85E-08 |
| rs34813     | 5   | 102433409 | A  | 0.310 | -0.016 | 0.002 | 9.80E-11 |
| rs1966265   | 5   | 176516631 | A  | 0.242 | 0.023  | 0.003 | 1.57E-18 |
| rs3733875   | 5   | 176637240 | T  | 0.118 | -0.020 | 0.003 | 6.73E-09 |
| rs1334576   | 6   | 7211818   | A  | 0.426 | -0.018 | 0.002 | 1.01E-15 |
| rs33932084  | 6   | 28268824  | G  | 0.110 | -0.030 | 0.004 | 9.76E-17 |
| rs1136695   | 6   | 29911064  | A  | 0.417 | -0.015 | 0.002 | 2.11E-11 |
| rs2240804   | 6   | 30920890  | A  | 0.336 | 0.018  | 0.002 | 7.21E-14 |
| rs1265097   | 6   | 31106459  | A  | 0.084 | 0.025  | 0.004 | 2.09E-10 |
| rs1050518   | 6   | 31324641  | A  | 0.274 | 0.020  | 0.003 | 6.83E-15 |
| rs35201773  | 6   | 31603045  | G  | 0.013 | 0.057  | 0.010 | 8.02E-09 |

SUPPLEMENTARY DATA

|             |    |           |   |         |        |       |          |
|-------------|----|-----------|---|---------|--------|-------|----------|
| rs535586    | 6  | 31860337  | T | 0.351   | -0.029 | 0.002 | 2.34E-34 |
| rs2070600   | 6  | 32151443  | T | 0.063   | 0.025  | 0.005 | 2.90E-08 |
| rs1059576   | 6  | 32489868  | G | 0.033   | 0.039  | 0.007 | 4.32E-08 |
| rs3207983   | 6  | 32609213  | A | 0.338   | 0.021  | 0.002 | 3.96E-18 |
| rs9469913   | 6  | 34827085  | T | 0.166   | -0.018 | 0.003 | 2.04E-09 |
| rs2242416   | 6  | 43273604  | A | 0.404   | 0.017  | 0.002 | 2.92E-14 |
| rs139745911 | 6  | 127767954 | A | 0.008   | 0.120  | 0.012 | 2.66E-22 |
| rs9388768   | 6  | 130374102 | C | 0.339   | -0.017 | 0.002 | 1.05E-12 |
| rs3124784   | 6  | 160952838 | A | 0.278   | 0.014  | 0.002 | 6.77E-09 |
| rs2301721   | 7  | 27196113  | C | 0.171   | -0.020 | 0.003 | 2.48E-11 |
| rs2301680   | 7  | 93116299  | A | 0.499   | 0.014  | 0.002 | 1.13E-09 |
| rs4072134   | 8  | 11872395  | G | 0.465   | 0.016  | 0.002 | 2.04E-12 |
| rs10902221  | 11 | 802379    | T | 0.499   | 0.016  | 0.002 | 3.29E-13 |
| rs140201358 | 11 | 823586    | G | 0.013   | 0.087  | 0.010 | 3.21E-19 |
| rs5215      | 11 | 17408630  | C | 0.352   | 0.016  | 0.002 | 2.68E-11 |
| rs62621409  | 11 | 36458997  | G | 0.041   | 0.031  | 0.006 | 1.86E-08 |
| rs34312154  | 11 | 47470345  | A | 0.107   | 0.021  | 0.004 | 3.24E-09 |
| rs35169799  | 11 | 64031241  | T | 0.061   | 0.046  | 0.005 | 2.65E-23 |
| rs3741378   | 11 | 65408937  | T | 0.139   | -0.023 | 0.003 | 1.24E-12 |
| rs10891314  | 11 | 111916647 | A | 0.360   | -0.023 | 0.002 | 4.48E-23 |
| rs11048413  | 12 | 26275555  | A | 0.474   | 0.016  | 0.002 | 1.26E-11 |
| rs12146709  | 12 | 30888001  | C | 0.246   | -0.015 | 0.003 | 6.21E-09 |
| rs145878042 | 12 | 48143315  | G | 0.010   | -0.077 | 0.011 | 1.72E-12 |
| rs2277339   | 12 | 57146069  | G | 0.107   | 0.024  | 0.004 | 4.55E-11 |
| rs3764002   | 12 | 108618630 | T | 0.260   | -0.017 | 0.003 | 5.37E-11 |
| rs34149579  | 12 | 123345509 | T | 0.050   | 0.037  | 0.005 | 4.69E-13 |
| rs11057353  | 12 | 124265687 | T | 0.390   | 0.019  | 0.002 | 3.22E-17 |
| rs75173589  | 12 | 124333367 | A | 0.014   | -0.059 | 0.009 | 5.90E-10 |
| rs11057401  | 12 | 124427306 | A | 0.309   | -0.036 | 0.002 | 1.78E-50 |
| rs36127550  | 12 | 133780309 | T | 0.177   | -0.018 | 0.003 | 5.45E-10 |
| rs151177426 | 14 | 21463013  | T | 0.00002 | -1.369 | 0.235 | 5.65E-09 |
| rs61747585  | 14 | 52508842  | A | 0.042   | 0.031  | 0.006 | 3.60E-08 |
| rs1051858   | 14 | 58831142  | G | 0.349   | 0.013  | 0.002 | 1.23E-08 |
| rs3959569   | 15 | 42115747  | C | 0.327   | 0.016  | 0.002 | 2.97E-11 |
| rs1715919   | 15 | 56756285  | G | 0.102   | 0.022  | 0.004 | 1.31E-09 |
| rs3747579   | 16 | 4445327   | C | 0.296   | 0.019  | 0.002 | 3.30E-14 |
| rs12923138  | 16 | 67233266  | C | 0.426   | -0.012 | 0.002 | 4.85E-08 |
| rs8052655   | 16 | 67409180  | A | 0.055   | -0.031 | 0.005 | 1.64E-09 |
| rs897453    | 17 | 17425631  | T | 0.457   | -0.020 | 0.002 | 4.77E-19 |
| rs11649804  | 17 | 17696755  | A | 0.305   | 0.015  | 0.002 | 8.75E-10 |
| rs712270    | 17 | 18057167  | T | 0.414   | -0.016 | 0.002 | 4.52E-13 |
| rs62070804  | 17 | 27889643  | T | 0.018   | 0.046  | 0.008 | 3.50E-08 |
| rs141385558 | 17 | 27893545  | T | 0.003   | 0.148  | 0.022 | 1.66E-11 |
| rs10445337  | 17 | 44067400  | C | 0.217   | 0.018  | 0.003 | 6.74E-11 |

## SUPPLEMENTARY DATA

|            |    |          |   |       |        |       |          |
|------------|----|----------|---|-------|--------|-------|----------|
| rs9907379  | 17 | 59489893 | T | 0.214 | 0.015  | 0.003 | 1.30E-08 |
| rs3744448  | 17 | 59533868 | C | 0.147 | 0.020  | 0.003 | 1.45E-10 |
| rs61742072 | 17 | 76433899 | A | 0.174 | -0.018 | 0.003 | 1.56E-09 |
| rs62621197 | 19 | 8670147  | T | 0.031 | -0.039 | 0.006 | 1.21E-09 |
| rs8104533  | 19 | 18377496 | G | 0.428 | -0.015 | 0.002 | 7.59E-12 |
| rs429358   | 19 | 45411941 | C | 0.154 | -0.030 | 0.003 | 2.97E-22 |
| rs1042917  | 21 | 47545768 | A | 0.486 | -0.013 | 0.002 | 1.41E-09 |
| rs4823086  | 22 | 30688659 | T | 0.122 | 0.019  | 0.003 | 3.88E-08 |
| rs1053593  | 22 | 35660875 | G | 0.363 | 0.014  | 0.002 | 6.88E-09 |

CHR, chromosome; BP, base pair; EA, effect allele; MAF, minor allele frequency. All variants including those at known loci and those in the MHC locus are included.
